# Supplementary material
Source: HighWire-hosted journal article supplement (https://jitc.bmj.com/content/13/4/e010566)
Supplement: inline-supplementary-material-3 [file inline-supplementary-material-3.xlsx]

## Sheet: 1D
Days after enrollment	Isotype Avg	Isotype SD	N	cDVD Tet tox Avg	cDVD Tet tox SD	N	Uncleavable aCTLA4 Avg	Uncleavable aCTLA4 SD	N	Symmetric cDVD aCTLA4 Avg	Symmetric cDVD aCTLA4 SD	N	Asymmetric cDVD aCTLA4 Avg	Asymmetric cDVD aCTLA4 SD	N	aCTLA4 Avg	aCTLA4 SD	N
0	155.951	36.0934	8	139.726	31.6175	7	140.534	27.3103	7	125.64	29.3544	7	139.073	45.3369	8	111.09	78.9919	7
3	197.411	42.7125	8	182.948	27.0874	7	169.666	27.5062	7	135.38	35.5955	7	153.549	57.553	8	158.539	117.021	7
10	260.326	66.7001	8	229.575	43.2188	7	220.628	74.0103	7	144.022	43.8641	7	157.39	74.5742	8	191.291	156.094	7
17	416.623	123.024	8	300.104	67.8557	7	354.618	118.682	7	144.547	70.6663	7	178.668	143.922	8	297.656	264.012	7
24	817.926	360.471	8	436.968	173.56	7	609.552	220.545	7	133.887	137.115	7	296.227	234.457	7	408.553	348.062	7
32	1392.74	554.05	8	769.741	281.184	7	1210.93	481.106	7	184.12	243.126	7	400.542	298.18	7	478.051	445.517	7
39	2046.11	435.086	8	1104.23	298.432	7	1872.34	431.887	7	285.524	411.008	7	646.285	464.164	7	546.664	525.279	7
46				1938.63	408.126	7				407.363	597.317	7	907.008	774.017	7	598.454	565.115	7
53										565.351	780.279	7	1126.52	882.054	7	634.367	596.674	7

## Sheet: 1E
Days after enrollment	Isotype	cDVD Tet tox	Uncleavable aCTLA4	Symmetric cDVD aCTLA4	Asymmetric cDVD aCTLA4	aCTLA4
32	1
32	1
39	1
39	1
39	1
39	1
39	1
39	1
39		1
39		1
46		1
46		1
46		1
46		1
46		1
67		1
32			1
39			1
39			1
39			1
46			1
46			1
46			1
53			1
63				1
77				1
84				1
84				1
96				1
120				0
120				0
120				0
32					1
46					1
60					1
53					1
86					1
92					1
120					0
120					0
86						1
92						1
92						1
96						1
106						1
120						0
120						0
120						0

## Sheet: 1F
Days after enrolment		Isotype	Isotype	Isotype	Isotype	Isotype	Isotype	Isotype	Isotype	tet tox	tet tox	tet tox	tet tox	tet tox	tet tox	tet tox	tet tox	unc	unc	unc	unc	unc	unc	unc	unc	αCTLA-4 DVD (Sym)	αCTLA-4 DVD (Sym)	αCTLA-4 DVD (Sym)	αCTLA-4 DVD (Sym)	αCTLA-4 DVD (Sym)	αCTLA-4 DVD (Sym)	αCTLA-4 DVD (Sym)	αCTLA-4 DVD (Sym)	αCTLA-4 DVD (ASym)	αCTLA-4 DVD (ASym)	αCTLA-4 DVD (ASym)	αCTLA-4 DVD (ASym)	αCTLA-4 DVD (ASym)	αCTLA-4 DVD (ASym)	αCTLA-4 DVD (ASym)	αCTLA-4 DVD (ASym)	αCTLA-4	αCTLA-4	αCTLA-4	αCTLA-4	αCTLA-4	αCTLA-4	αCTLA-4	αCTLA-4
0		100								100								100								100								100								100
4		99.6663	102.406	101.125	100.719	102.703	100	101.068	100.865	98.77	103.422	101.146	101.031	102.335	101.053	103.704	98.7648	100.486	100.57	105.215	101.987	100.065	99.7315	100.012	100.487	96.162	102.673	103.855	95.8763	103.502	99.631	97.1223	102.593	104.1	98.3572	96.3221	99.6269	101.767	97.4545	99.2754	102.316	90.6455	99.4572	94.0804	101.186	101.961	100	86.2319	95.5231
7		97.9607	103.459	101.584	100	105.856	101.845	103.203	101.276	99.5847	102.988	101.065	100	101.556	101.754	103.333	98.1525	100.799	101.549	105.634	101.969	98.9619	98.3471	100.669	100.323	99.403	103.155	102.93	96.2199	105.058	99.8532	97.0426	100.37	104.963	98.7784	98.103	98.1343	99.2933	97.4545	98.5507	101.846	91.6892	101.745	92.8891	98.419	96.0784	97.4074	81.8841	91.3662
12		102.41	102.861	101.945	100.36	104.955	101.307	102.847	101.433	99.9652	103.437	101.887	100	100.778	102.456	102.963	98.3369	101.755	101.986	105.731	101.924	100.692	97.5207	97.3244	99.8679	102.729	107.09	107.016	96.9072	103.615	100.369	95.3237	100.741	107.682	101.727	105.73	95.1493	98.2348	97.4545	96.0145	101.346	93.9698	105.506	94.4527	98.0237	98.4314	95.1852	81.1594	90.7588
18		109.195	105.564	102.415	96.7626	103.604	97.417	99.6441	101.182	100.155	103.663	101.9	101.485	101.946	102.105	102.333	99.0174	102.011	102.342	105.774	98.2332	97.9239	96.281	96.6555	100.115	102.26	107.053	101.696	97.5945	104.28	98.893	101.079	101.111	112.041	104.254	108.711	94.0299	96.1131	98.1818	89.4928	101.764	90.0657	103.955	93.2986	96.8379	89.8039	90.7407	79.7101	86.9863
21		107.935	103.421	102.696	97.8417	102.922	100.92	94.6619	101.623	102.357	103.741	102.005	99.3127	101.671	103.158	102.222	99.2155	102.474	102.137	105.348	99.6466	97.2318	94.2149	98.8465	100.209	103.629	107.542	100.077	91.0653	108.949	98.7562	100.801	103.333	111.653	103.665	109.498	94.403	96.8198	94.1818	85.5072	101.649	87.901	98.8368	96.5004	94.0711	82.7451	81.8519	76.087	84.1313

## Sheet: 2C
Empty iso	Empty CTLA4	Empty cDVD sym	Empty Uncleavable	PSCA iso	PSCA CTLA4	PSCA cDVD sym	PSCA Uncleavable
501000	49400	294000	155000	323000	39900	4390	30300
76800	65200	20200	65000	257000	34000	11800	73300
311000	67700	159000	326000	930000	35300	4000	137000
232000	85200	110000	75300		93300	16400	340000
			308000		126000

## Sheet: 2E - S2H
Days post implantation	Empty iso	Empty CTLA4	Empty cDVD sym	Empty Uncleavable	mPSCA iso	mPSCA CTLA4	mPSCA cDVD sym	mPSCA Uncleavable
14	1
16	1
18	1
20	1
20	1
22	1
22	1
22	1
24	1
24	1
18		1
18		1
20		1
20		1
24		1
24		1
27		1
50		0
50		0
50		0
18			1
18			1
20			1
22			1
24			1
24			1
24			1
28			1
32			1
32			1
16				1
18				1
20				1
20				1
22				1
22				1
22				1
22				1
28				1
28				1
14					1
14					1
16					1
18					1
18					1
20					1
22					1
22					1
22					1
22					1
18						1
21						1
21						1
21						1
24						1
24						1
26						1
50						0
50						0
50						0
18							1
20							1
22							1
27							1
50							0
50							0
50							0
50							0
50							0
50							0
16								1
16								1
16								1
18								1
20								1
20								1
22								1
22								1
26								1
26								1

## Sheet: 2F
Days after implantation	Empty iso	n	SD	Empty Uncleavable	n	SD	Empty cDVD sym	n	SD	Empty CTLA4	n	SD	PSCA iso	n	SD	PSCA Uncleavable	n	SD	PSCA cDVD sym	n	SD	PSCA CTLA4	n	SD
0	100	10	0	100	10	0	100	10	0	100	10	0	100	10	0	100	10	0	100	10	0	100	10	0
4	100.293	10	1.238	99.7633	10	1.18517	100.62	10	0.426732	100.14	10	0.632218	100.873	10	0.42548	100.093	10	1.94088	100.663	10	0.795131	100.667	10	0.6354
7	100.28	10	0.784602	100.01	10	0.774855	100.513	10	0.46929	100.383	10	0.289885	100.62	10	0.334215	100.04	10	1.85267	100.363	10	0.37899	100.743	10	0.690242
10	100.147	10	0.552479	99.41	10	0.653835	100.283	10	0.336204	98.6233	10	0.181475	100.413	10	0.228108	100.07	10	1.1905	99.9133	10	0.580718	97.49	10	0.47571
14	99.3767	10	0.672483	99.2333	10	0.760022	100.133	10	0.0351188	95.48	10	1.16047	100.39	10	0.42	99.8267	10	1.17091	99.6567	10	0.483356	95.7933	10	0.430155
17	97.87	10	0.71631	97.99	10	0.779487	98.7733	10	0.410406	92.81	10	0.403361	98.0633	10	0.205994	97.6667	10	0.856582	99.41	10	0.592537	93.0367	10	0.47648

## Sheet: 3A
Empty iso	Empty CTLA4	Empty cDVD sym	Empty Uncleavable	PSCA iso	PSCA CTLA4	PSCA cDVD sym	PSCA Uncleavable
2.61	3.23	3.75	5.18	3.45	4.66	7.54	2.94
3.32	6.5	3.93	4.5	2.78	6.29	8.11	5.76
5.17	5.78	2.75	4.87	3.71	5.06	9.24	3.01

## Sheet: 3B
Empty iso	Empty CTLA4	Empty cDVD sym	Empty Uncleavable	PSCA iso	PSCA CTLA4	PSCA cDVD sym	PSCA Uncleavable
33.9	23.3	39.1	38.5	51.5	21.2	23.9	45.2
35.8	22.1	44.6	47.6	29.4	27.6	20.5	46.9
34.8	20.8	49.7	34.8	26.6	17	22.5	39.5

## Sheet: 3C
Empty iso	Empty Uncleavable	Empty cDVD sym	Empty CTLA4	PSCA iso	PSCA Uncleavable	PSCA cDVD sym	PSCA CTLA4
42.8	22.3	39.2	75.8	51.6	59.2	80.3	88.7
57.2	61.5	35.8	77.2	58.7	53.3	85.1	72.3
58.3	49.6	48.1	81.8	48.8	46.9	80.6	77.9

## Sheet: 3D
Empty iso	Empty Unc	Empty DVD	Empty CTLA4	PSCA iso	PSCA Unc	PSCA DVD	PSCA CTLA4
0.53	0.16	2.42	1.05	4.1	6.64	6.26	2.56
1.08	1.52	4.15	5.95	1.54	5.8	11.28	2.92
0.53	1.09	1.47	6.88	0.28	7.12	14.6	4.7

[truncated: 27 more sheets: 3F, 3G, 3H, 3I, 4A, 4B, 4C, 4D, 4E, 4G, 4H, 4I, 4J, 4K, 4L, S1B, S1C, S2D, S2E, S2F …]
